# Supplementary material for: Targeting the CALCB/RAMP1 axis inhibits growth of Ewing sarcoma
Source: PubMed Central journal article supplement (PMC6370763; doi:10.1038/s41419-019-1372-0), 2019-02-11
Supplement: 41419_2019_1372_MOESM1_ESM.pdf [file 41419_2019_1372_MOESM1_ESM.pdf]

## SUPPLEMENTARY INFORMATION

### Supplementary Table 1

Microarray data accession codes

### Supplementary Table 2

Mass spectrometric detection of CALCA and CALCB in EwS cell line supernatants

## SUPPLEMENTARY FIGURES

### Supplementary Figure S1 Dallmayer *et al.*

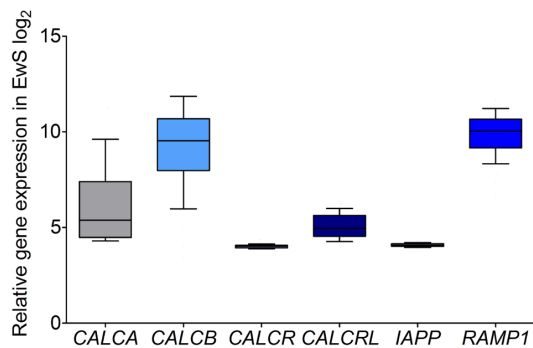

### Supplementary Figure S1: Comparison of *CALCA*, *CALCB*, *CALCR*, *CALCRL*, *IAPP*, and *RAMP1* expression levels in EwS

Analysis of expression levels of publicly available microarray data of 50 primary EwS tumors are shown in log<sub>2</sub>-scale. Data are represented as box-plots. Horizontal bars indicate median expression levels, boxes the interquartile range. Whiskers indicate the 10<sup>th</sup> and 90<sup>th</sup> percentile, respectively.

**Supplementary Figure S2** Dallmayer *et al.*

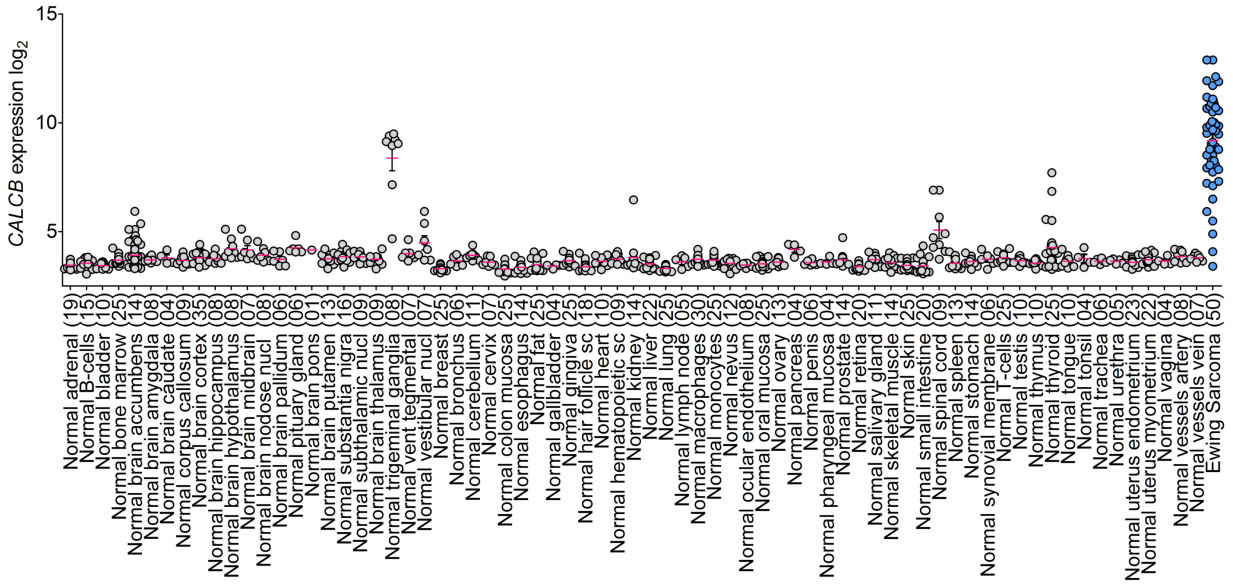

**Supplementary Figure S2: *CALCB* Expression in 71 normal tissue types and EwS**

Publicly available microarray data are represented as scatter plot in log<sub>2</sub>-scale with red bars representing means, and whiskers representing the SEM. Each dot represents one sample. Number of samples is given in parentheses. EwS is highlighted in blue color.

**Supplementary Figure S3** Dallmayer *et al.*

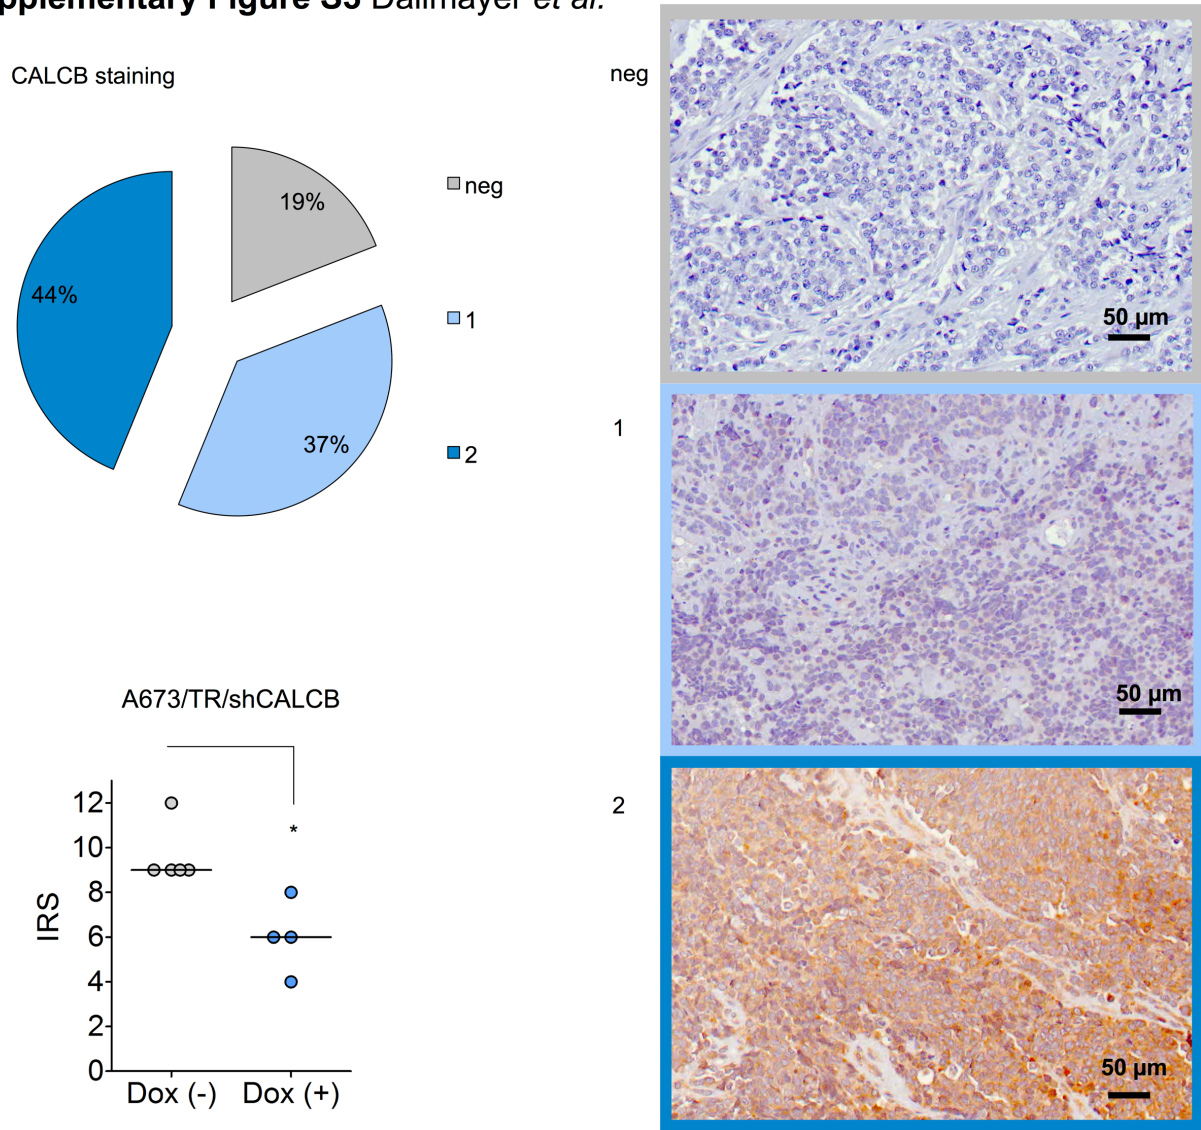

**Supplementary Figure S3: EwS TMA stained for CALCB**

A EwS TMA comprising 89 primary EwS samples was stained with a specific antibody against human CALCB. The left circular chart shows proportion of staining intensities of the samples. Micrographs on the right show representative samples with CALCB staining intensity 0 (upper picture), 1 (middle picture), and 2 (lower picture). The left lower plot shows the IRS of CALCB staining of tissue from xenografted A673/TR/shCALCB EwS cells carrying a dox-inducible shRNA against *CALCB*. Each dot represents one sample ( $n \geq 4$  per group), horizontal bars represent medians. Mann-Whitney-test. \*  $P \leq 0.05$

**Supplementary Figure S4** Dallmayer *et al.*

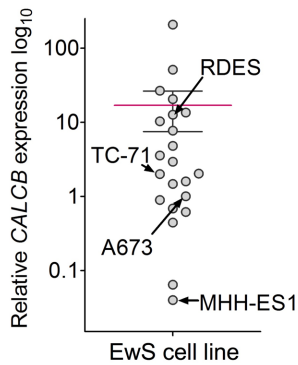

**Supplementary Figure S4: Analysis of relative *CALCB* expression in EwS cell lines**

Relative *CALCB* expression levels of 21 EwS cell lines relative to the A673 EwS cell line were determined by qRT-PCR. Data are shown as scatter plot in  $\log_{10}$  scale. Each dot represents the mean *CALCB* expression from two independent replicates for each cell line. The horizontal bar represents the mean expression, whiskers indicate the SEM.

**Supplementary Figure S5** Dallmayer *et al.*

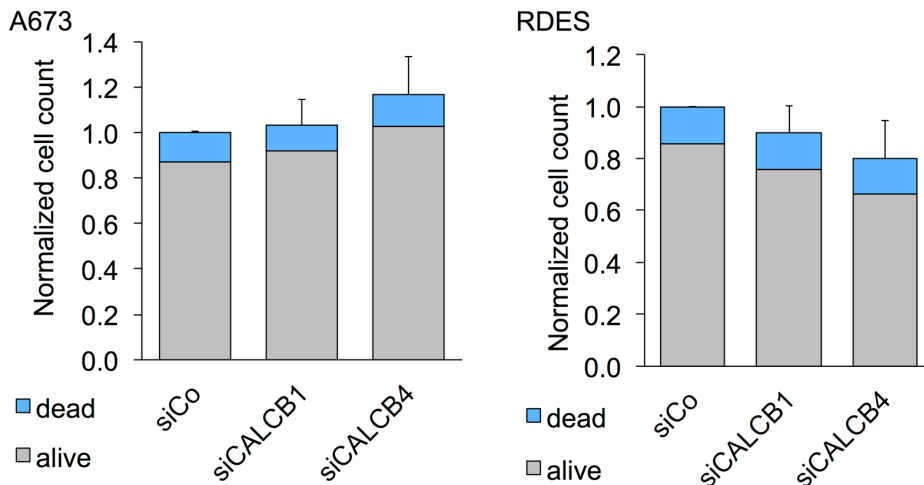

**Supplementary Figure S5: Analysis of short-term proliferation of A673 and RDES EwS cells after silencing of *CALCB***

Cells were transiently transfected with specific siRNAs against *CALCB* (siCALCB1 and siCALCB4) or non-targeting control siRNA (siCo). Cells were harvested after 48-72 h after transfection and the number of viable and dead cells was determined by standardized hemocytometry including cell culture supernatants. Data are represented as means and SEM ( $n_{A673} = 2-4$ ;  $n_{RDES} = 3$ ).

**Supplementary Figure S6** Dallmayer *et al.*

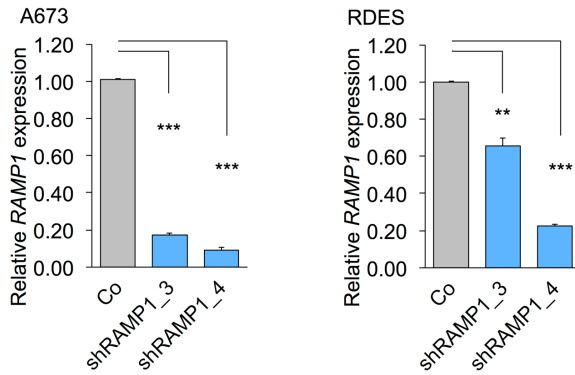

**Supplementary Figure S6: Validation of *RAMP1* knockdown**

The graphs show knockdown of *RAMP1* as determined by qRT-PCR in A673 and RDES EwS cells carrying dox-inducible shRNAs against *RAMP1* obtained from *in vitro* assays. Data are means and SEM,  $n \geq 3$ ; unpaired two-tailed Student's t-test. \*\*  $P \leq 0.01$ ; \*\*\*  $P \leq 0.001$

**Supplementary Figure S7** Dallmayer *et al.*

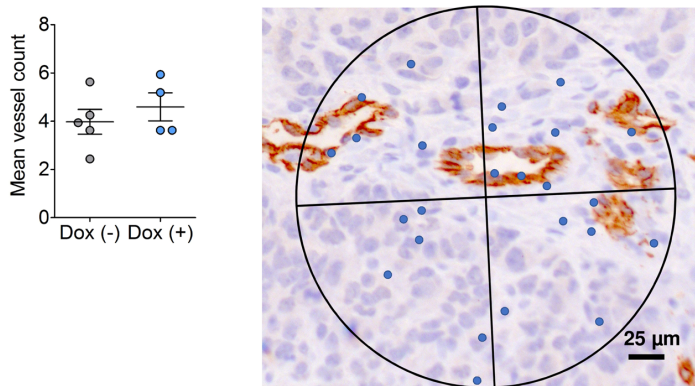

**Supplementary Figure S7: Microvessel density evaluation in CD31 stained xenografts**

Left panel shows mean microvessel count evaluated in murine CD31 stained EwS Xenografts with/without silencing of *CALCB* in the tumors (dox +/-). Each dot represents mean microvessel density evaluated in 4 high power fields of one tumor. Horizontal bars indicate the mean, whiskers the SEM. Right panel: representative CD31 stained slide with Chalkley grid.
